# Supplementary material for: Interfacial coupling of transition-metal composites with nitrogen-doped carbon as efficient catalysts of hydrogenation of nitro compounds
Source: Royal Society of Chemistry journal article supplement (doi:10.1039/d4nj00970c), 2024-01-01
Supplement: d4nj00970c1.pdf [file d4nj00970c1.pdf]

## **Interfacial coupling of transition-metal composites with nitrogen doped carbon as efficient catalysts for nitro-compounds hydrogenation †**

Yingping Li,<sup>a</sup> Zhiqiang Chen,<sup>c</sup> Jieryue Wang,<sup>a</sup> Mingyue Wang,<sup>a</sup> Wenhai Wang,<sup>a</sup> Mingfu Ye,<sup>a</sup> Dehong Wu,<sup>\*,b</sup> Binbin Jiang<sup>\*,d</sup> and Konglin Wu<sup>\*,a</sup>

a. Institute of Clean Energy and Advanced Nanocatalysis (iClean), Anhui International Joint Research Center for Green Manufacturing and Biotechnology of Energy Materials, School of Chemistry and Chemical Engineering, Anhui University of Technology, Maanshan 243032, China. E-mails: [klwuchem@ahut.edu.cn](mailto:klwuchem@ahut.edu.cn)

b. Emergency Management Bureau of Jiangan County, Yibin 644200, China. E-mail: [wudehong511523@163.com](mailto:wudehong511523@163.com)

c. Beijing Key Laboratory of Research and Application for Aerospace Green Propellants, Aerospace Liquid Propellant Research Center, Beijing Institute of Aerospace Testing Technology, Beijing 100074, China

d. School of Chemistry and Chemical Engineering, Anhui Key Laboratory of Photoelectric-Magnetic Functional Materials, Anqing Normal University, Anqing 246001, China. E-mail: [jiangbb@aqnu.edu.cn](mailto:jiangbb@aqnu.edu.cn)

## **1. Experimental section**

### **1.1 Chemicals and materials**

$C_8H_{12}ClNO_2$  (98%), nitrobenzene and other nitroarenes were purchased from Aladdin Industrial Corporation.  $(NH_4)_6Mo_7O_{24}\cdot 4H_2O$ ,  $Na_2WO_4\cdot 2H_2O$ ,  $NH_4VO_3$ ,  $K_2Cr_2O_7$ ,  $N_2H_4\cdot H_2O$  (85%),  $NH_3\cdot H_2O$  and ethanol were supplied by Sinopharm Chemical Reagent Co., Ltd. All chemicals were of analytical grade and used as purchased without further purification.

### **1.2 The synthesis of catalysts**

#### **1.2.1. Synthesis of $Cr_2O_3/NC$ and NC**

1.25 g of  $C_8H_{12}ClNO_2$  and 0.18 g of  $K_2Cr_2O_7$  were dissolved into 30 mL of ultrapure water by ultrasonication for 0.5 h, named as solution A. Meanwhile, 1.9 mL of ammonia was slowly added to a mixture of 100 mL ethanol and 225 mL water, named as solution B. Then, the solution A was added into solution B with continuous stirring. After stirring with 24 h, the product was being filtered and washed with deionized water and ethanol for several times, the  $Cr_2O_3/PDA$  precursors were achieved with freeze-drying. The last, the  $Cr_2O_3/PDA$  precursors were heated in a tube furnace and annealed at 700 °C for 3 h under  $N_2$  flow with a ramp rate of 3 °C·min<sup>-1</sup>, and the black catalyst was obtained named  $Cr_2O_3/NC$ . NC was synthesized by the similar method except that no  $K_2Cr_2O_7$  was added.

#### **1.2.2. Synthesis of $Cr_2O_3$**

5 g of  $K_2Cr_2O_7$  was measured in crucible and calcined at 900 °C in a muffle furnace for 2.5 h. After calcination, the material was washed with deionized water and acetone for several times. After washing,  $Cr_2O_3$  were achieved and dried at 80 °C overnight.

#### **1.2.3. Synthesis of $Mo_2C/NC$**

$Mo_2C/NC$  was synthesized by the same procedure of the synthesis of  $Cr_2O_3/NC$ . The pyrolysis temperatures were 800 °C.

#### **1.2.4. Synthesis of $V_2O_5/NC$**

$V_2O_5/NC$  was synthesized by the same procedure of the synthesis of  $Cr_2O_3/NC$ . The pyrolysis temperatures were 800 °C.

#### **1.2.5. Synthesis of $WO_x/NC$**

$WO_x/NC$  was synthesized by the same procedure of the synthesis of  $Cr_2O_3/NC$ . The pyrolysis temperatures were 900 °C.

### **1.3 Characterization**

The achieved nanocomposites were characterized by X-ray powder diffraction (XRD, Rigaku Ultima IV), Transmission electron microscopy (TEM, Hitachi H-7700), Scanning electron microscopy (SEM, JSM-6700F), high resolution TEM (HRTEM), high angle annular dark field scanning transmission electron microscopy (HAADF-STEM) and elemental mapping by energy-dispersive X-ray spectrometry (EDS, JEOL JEM-2100F), X-ray photoelectron spectroscopy (XPS, Thermo Fisher Scientific ESCALAB 250Xi), Raman spectrometer (Jobin Yvon LabRam HR evolution). The metal contents in achieved product were detected by ICP-OES (Agilent 720). The catalytic process performance was directed by GC (QP2030 NX) equipped with a FID detector and a Rtx-1 column (30 m×0.32 mm×0.25 mm). The structure of the product was confirmed by comparison with a standard sample and by GC-MS (QP2030 NX).

### **1.4 Catalytic hydrogenation of nitrobenzene**

The hydrogenation of nitrobenzene was carried out in a 15 ml pressure bottle. Typically, 1 mmol nitrobenzene, 10 mg Cr<sub>2</sub>O<sub>3</sub>/NC catalyst, and 5 mL of ethanol were refluxed and were allowed to stir at 40 °C, followed by the addition of 2 mL N<sub>2</sub>H<sub>4</sub>·H<sub>2</sub>O (85 wt%). Reaction samples were collected every 5 min using an injection syringe and filtered, then the crude mixture was diluted with ethanol, followed by gas chromatography-mass spectrometry (GCMS-QP2020 NX) analysis. Nitrobenzene was completely transferred to aniline within 1 hour.

To demonstrate the high efficiency of the prepared catalyst, the selective hydrogenation of different nitro-compound substrates was carried out under the same conditions as mentioned above.

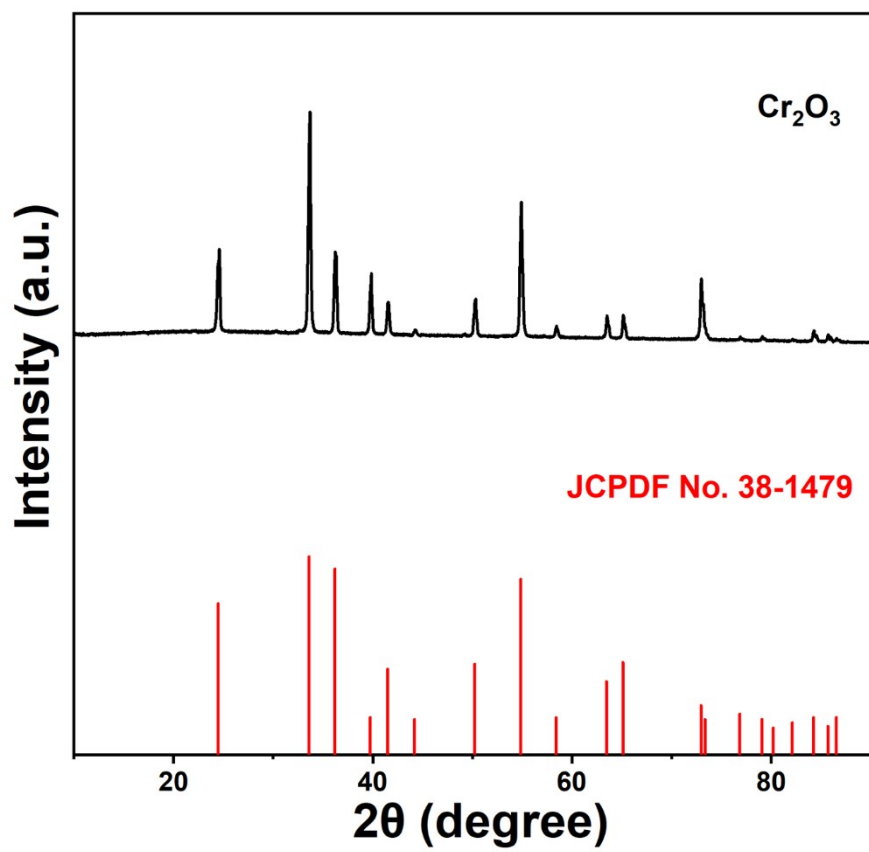

Fig. S1. XRD pattern of  $\text{Cr}_2\text{O}_3$ .

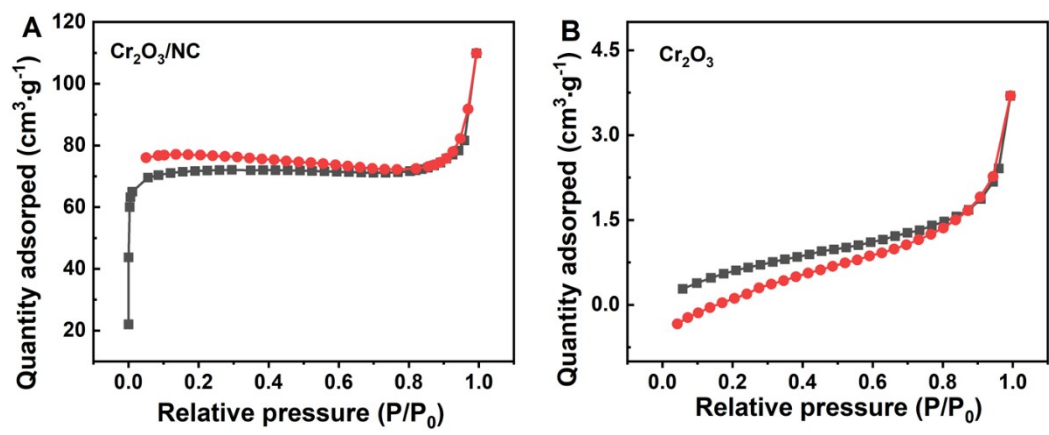

Fig. S2. BET surface area of (A)  $\text{Cr}_2\text{O}_3/\text{NC}$  and (B)  $\text{Cr}_2\text{O}_3$ .

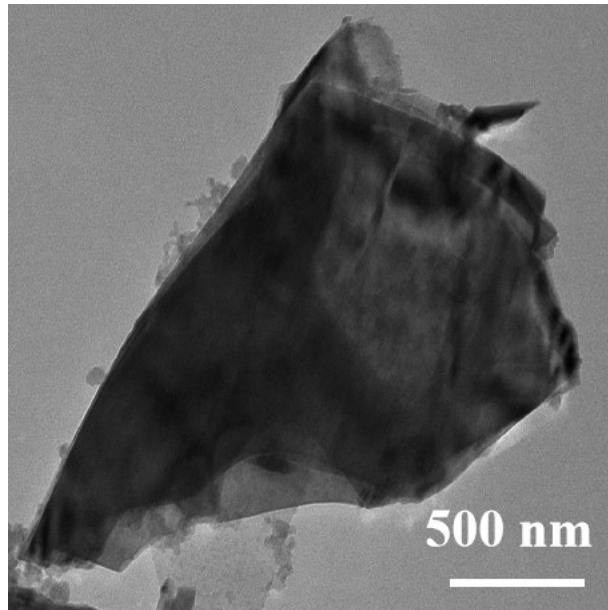

**Fig. S3.** The TEM image of Cr<sub>2</sub>O<sub>3</sub>.

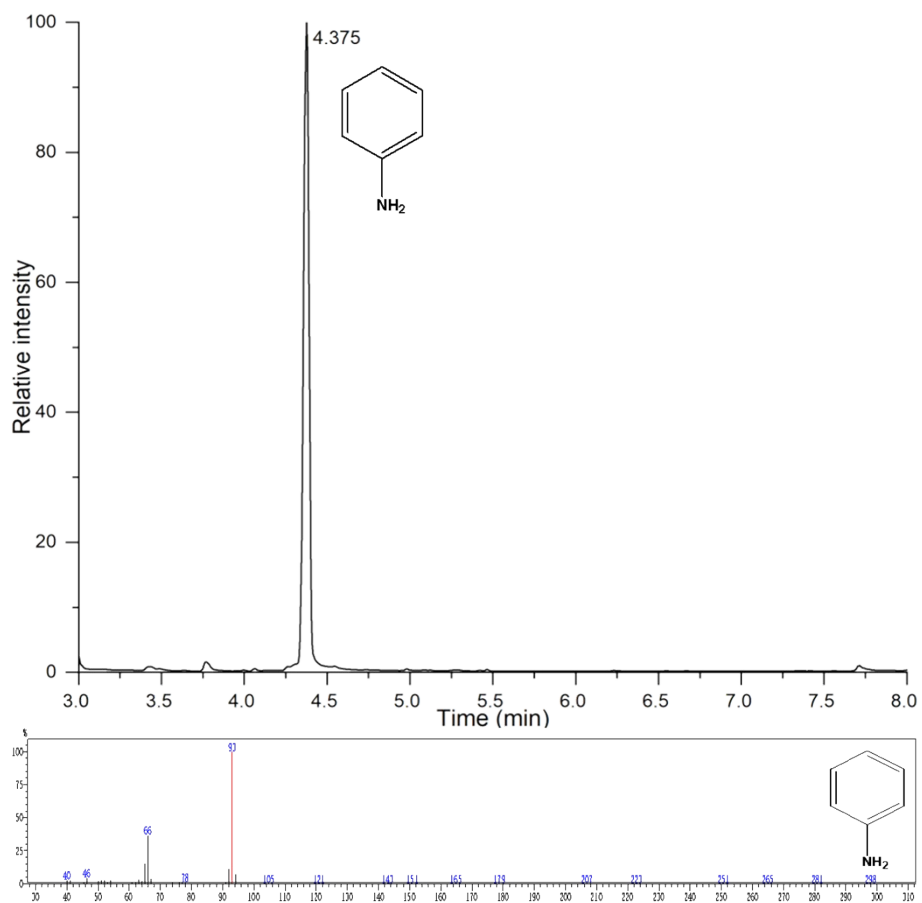

**Fig. S4.** GC-MS data of hydrogenation of nitrobenzene to aniline results by using  $\text{Cr}_2\text{O}_3/\text{NC}$  as catalysts.

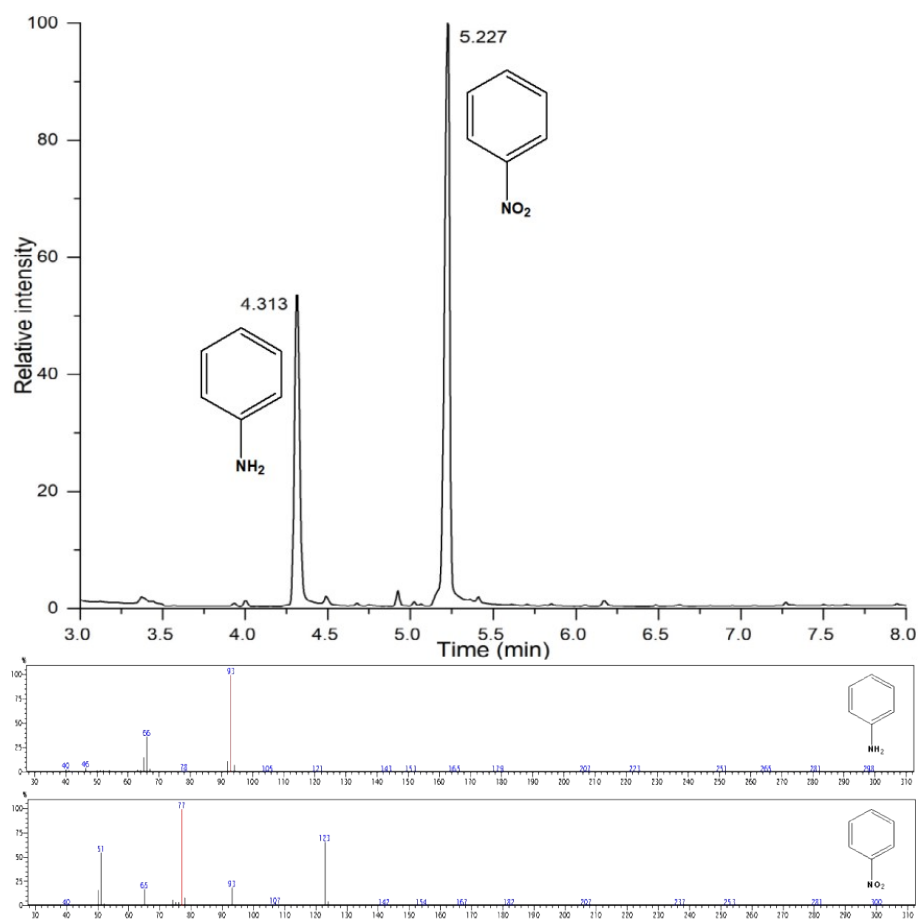

**Fig. S5.** GC-MS data of hydrogenation of nitrobenzene to aniline results by using  $\text{Cr}_2\text{O}_3$  as catalysts.



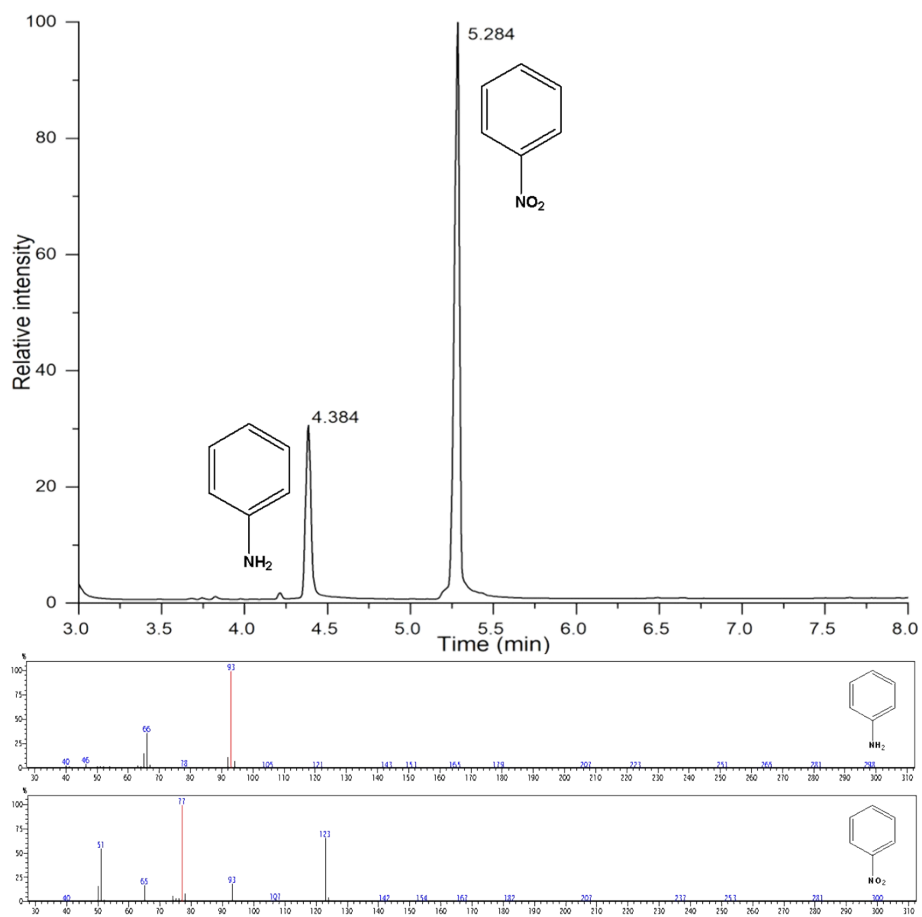

Fig. S6. GC-MS data of hydrogenation of nitrobenzene to aniline results by using NC as catalysts.

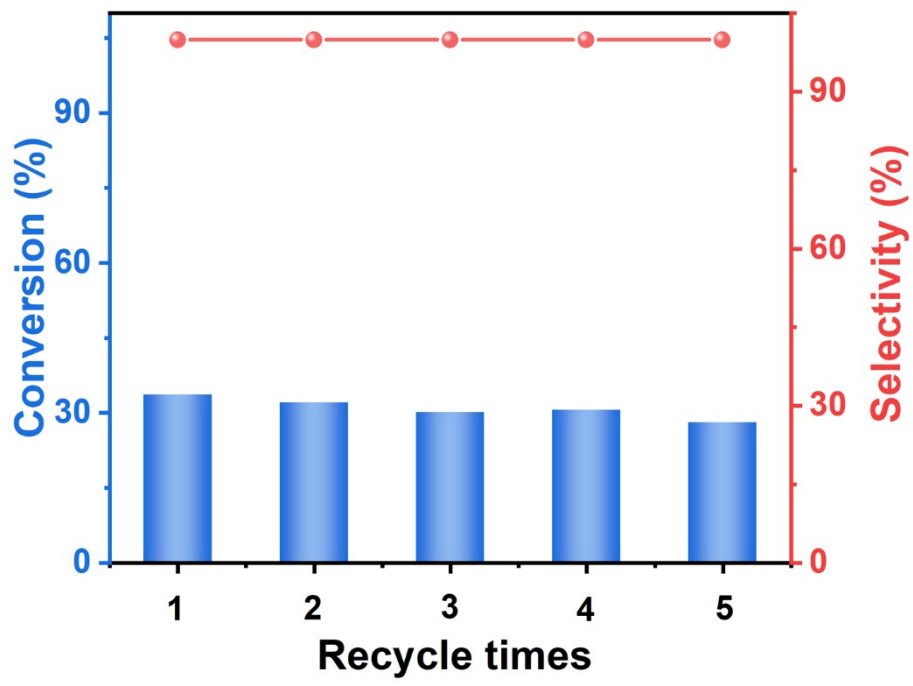

Fig. S7. The stability activities of  $\text{Cr}_2\text{O}_3$  with 5 cycles.

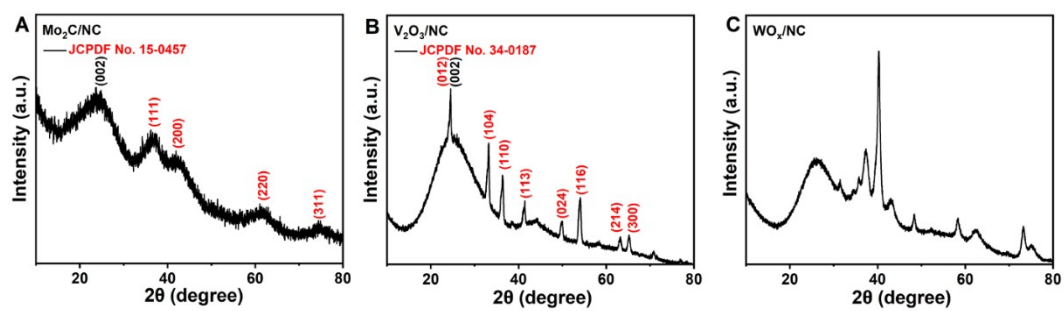

**Fig. S8.** The XRD patterns of  $\text{Mo}_2\text{C}/\text{NC}$ ,  $\text{V}_2\text{O}_3/\text{NC}$  and  $\text{WO}_x/\text{NC}$ .

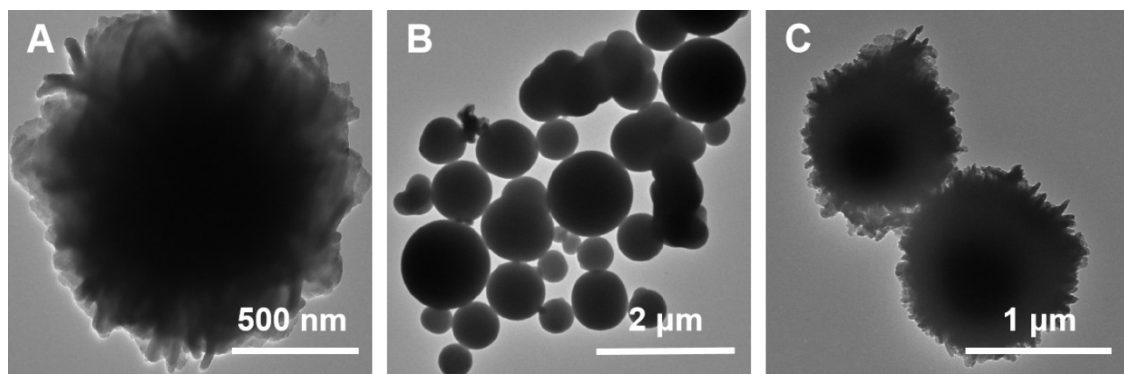

**Fig. S9.** The TEM image of Mo<sub>2</sub>C/NC, V<sub>2</sub>O<sub>3</sub>/NC, WO<sub>x</sub>/NC.

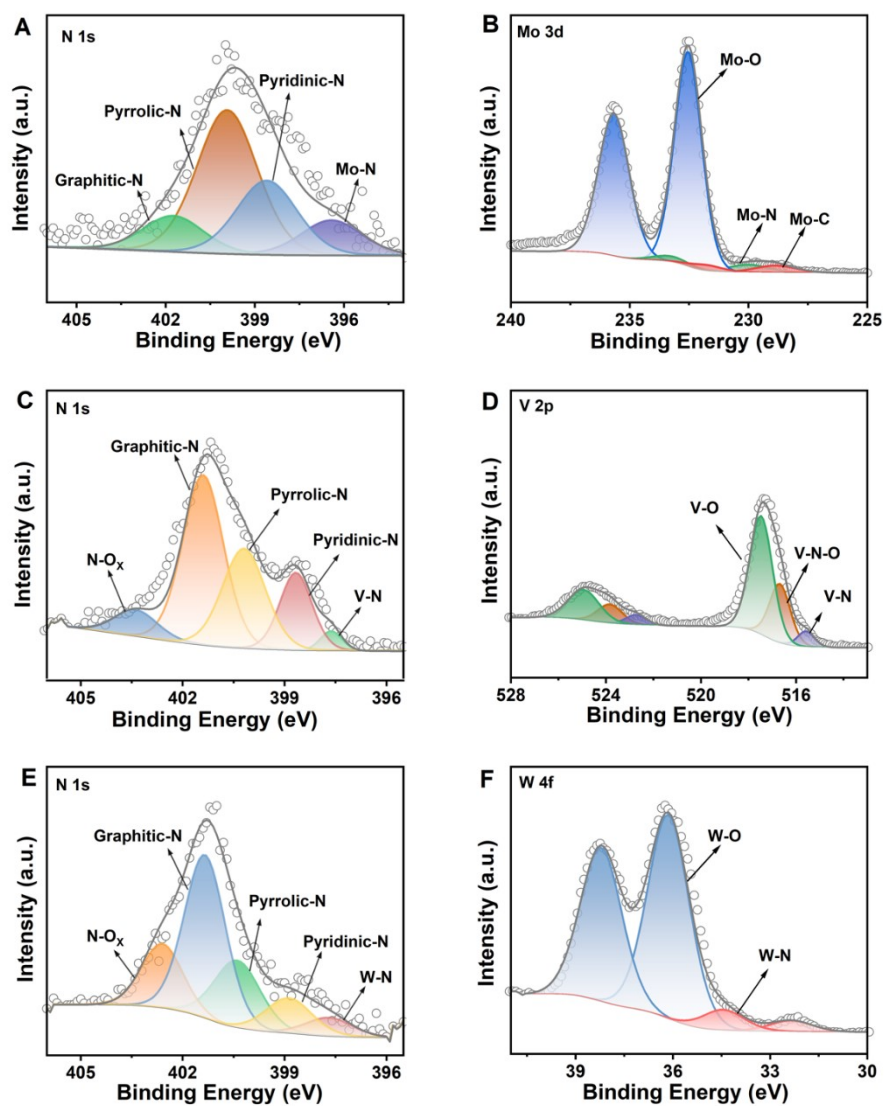

**Fig. S10.** The high resolution XPS spectra of (A) N 1s, (B) Mo 3d of Mo<sub>2</sub>C/NC, (C) N 1s, (D) V 2p of V<sub>2</sub>O<sub>3</sub>/NC, (E) N 1s and (F) W 4f of WO<sub>x</sub>/NC.

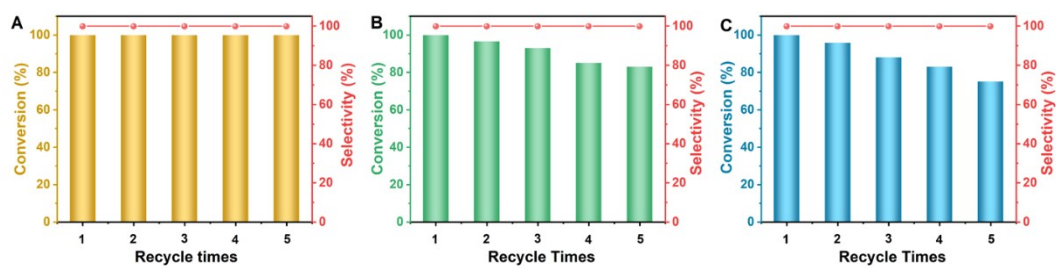

**Fig. S11.** Stability activities of Mo<sub>2</sub>C/NC, V<sub>2</sub>O<sub>3</sub>/NC, WO<sub>x</sub>/NC with 5 recycle times.

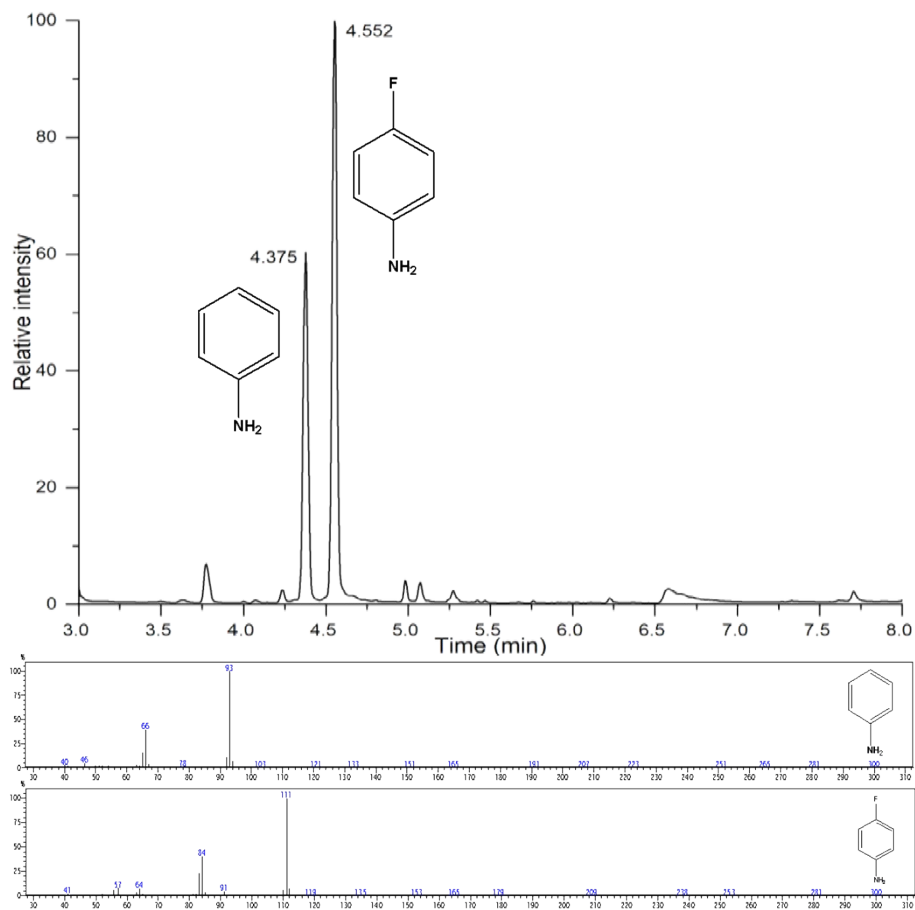

Fig. S12. GC-MS data of 1-Fluoro-4-nitrobenzene reaction results by using  $\text{Cr}_2\text{O}_3/\text{NC}$  as catalysts.

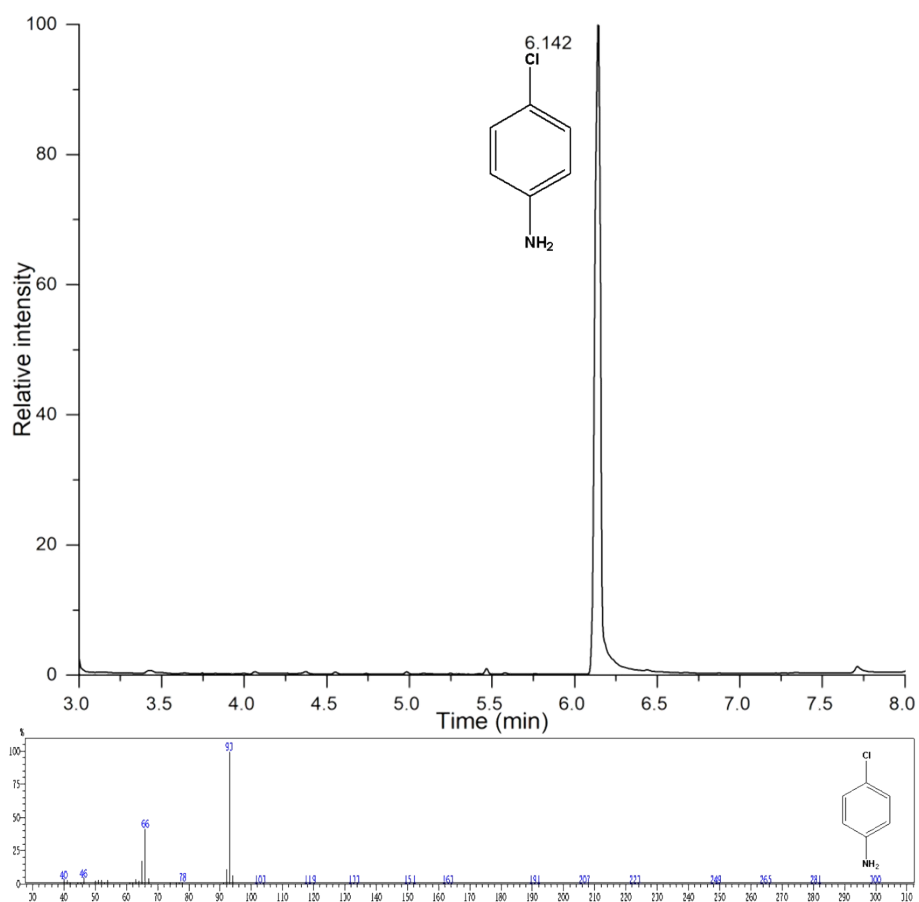

**Fig. S13.** GC-MS data of 1-Chloro-4-nitrobenzene reaction results by using  $\text{Cr}_2\text{O}_3/\text{NC}$  as catalysts.



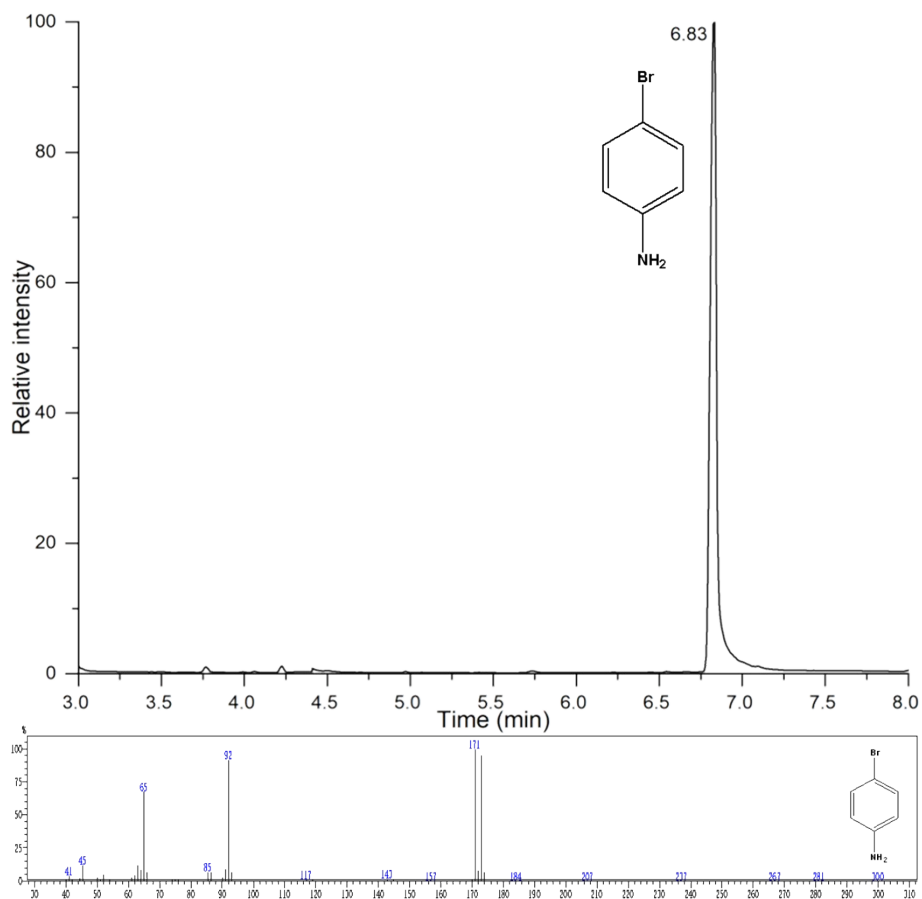

**Fig. S14.** GC-MS data of 1-Bromo-4-nitrobenzene reaction results by using  $\text{Cr}_2\text{O}_3/\text{NC}$  as catalysts.

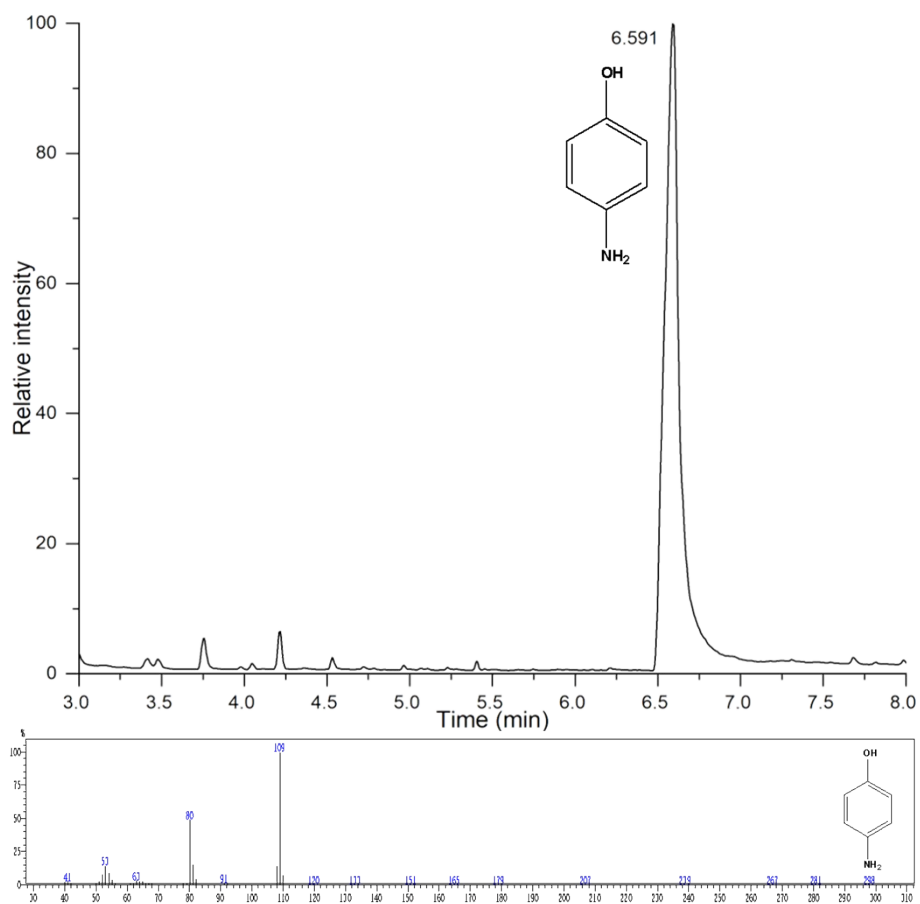

**Fig. S15.** GC-MS data of P-Nitrophenol reaction results by using  $\text{Cr}_2\text{O}_3/\text{NC}$  as catalysts.

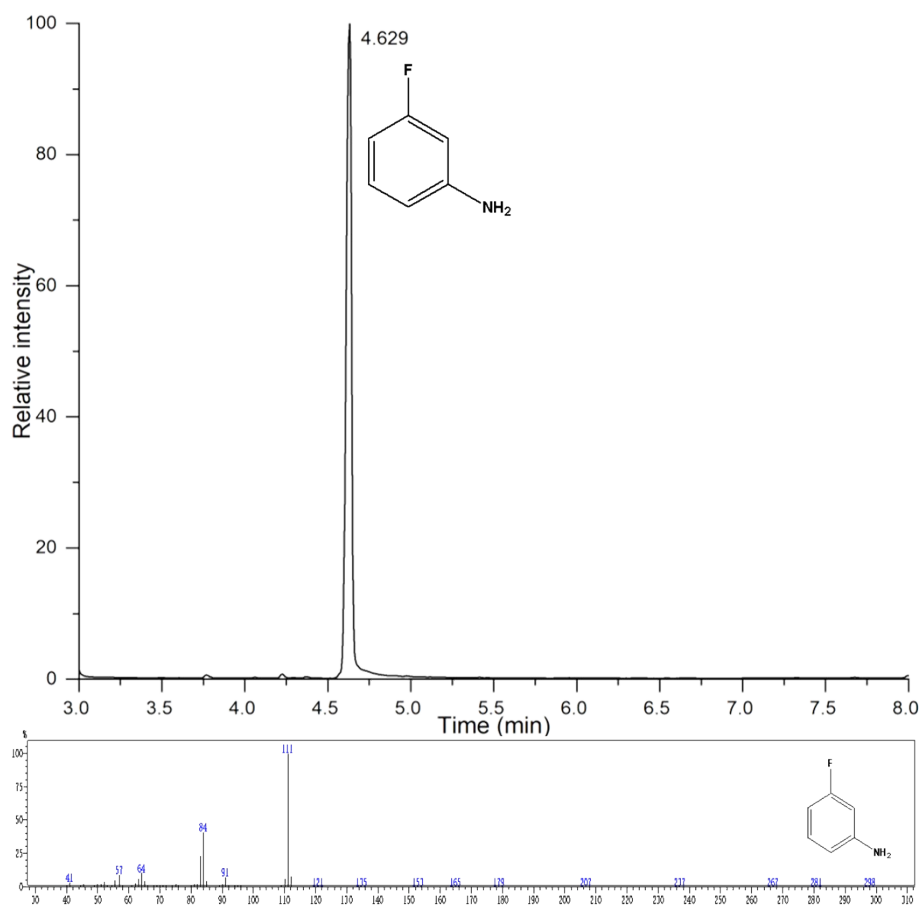

**Fig. S16.** GC-MS data of 1-Fluoro-3-nitrobenzene reaction results by using  $\text{Cr}_2\text{O}_3/\text{NC}$  as catalysts.

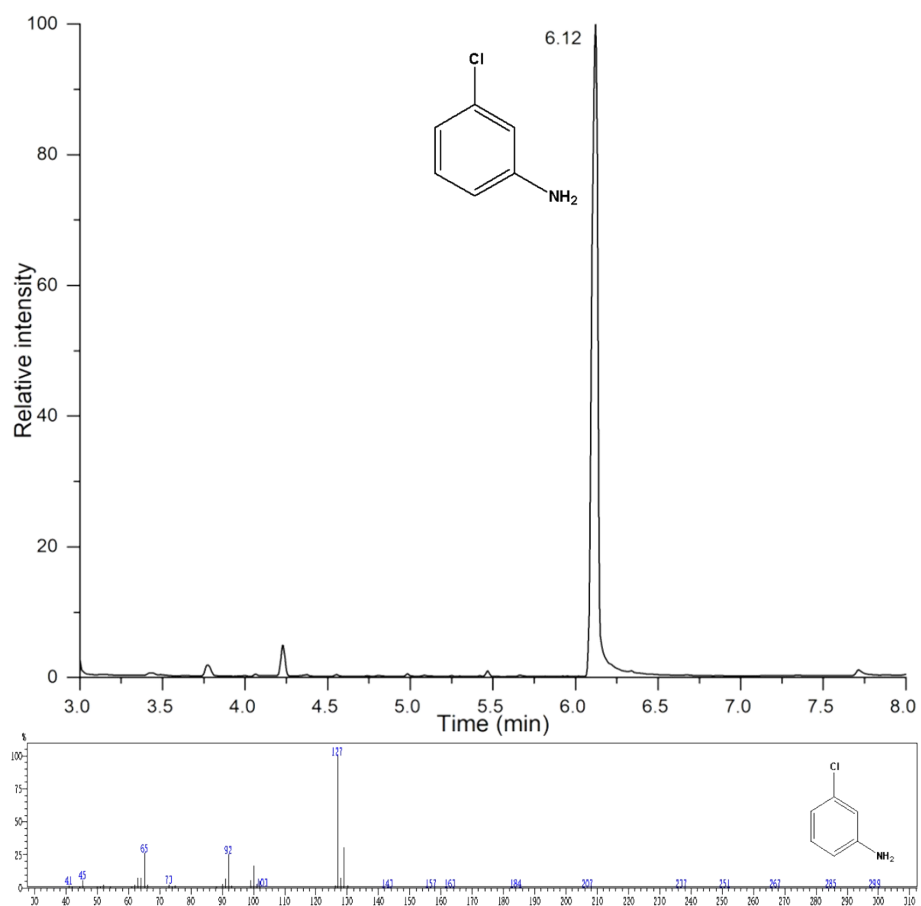

**Fig. S17.** GC-MS data of 1-Chloro-3-nitrobenzene reaction results by using  $\text{Cr}_2\text{O}_3/\text{NC}$  as catalysts.

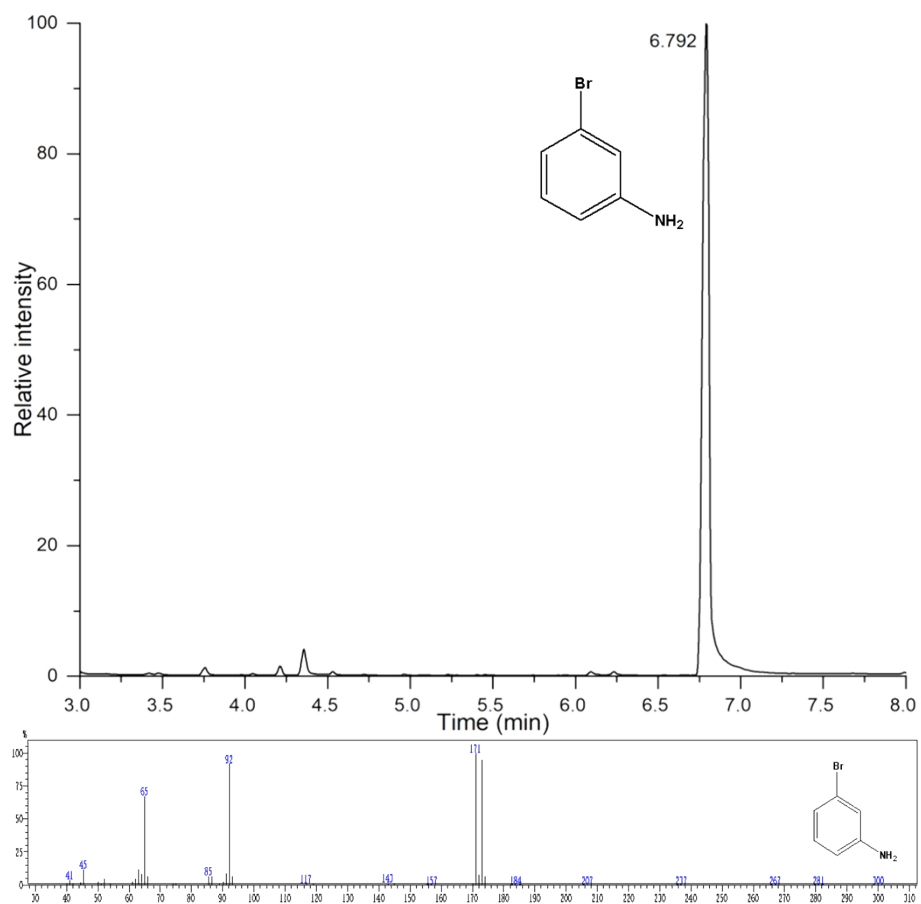

**Fig. S18.** GC-MS data of 3-Bromonitrobenzene reaction results by using  $\text{Cr}_2\text{O}_3/\text{NC}$  as catalysts.

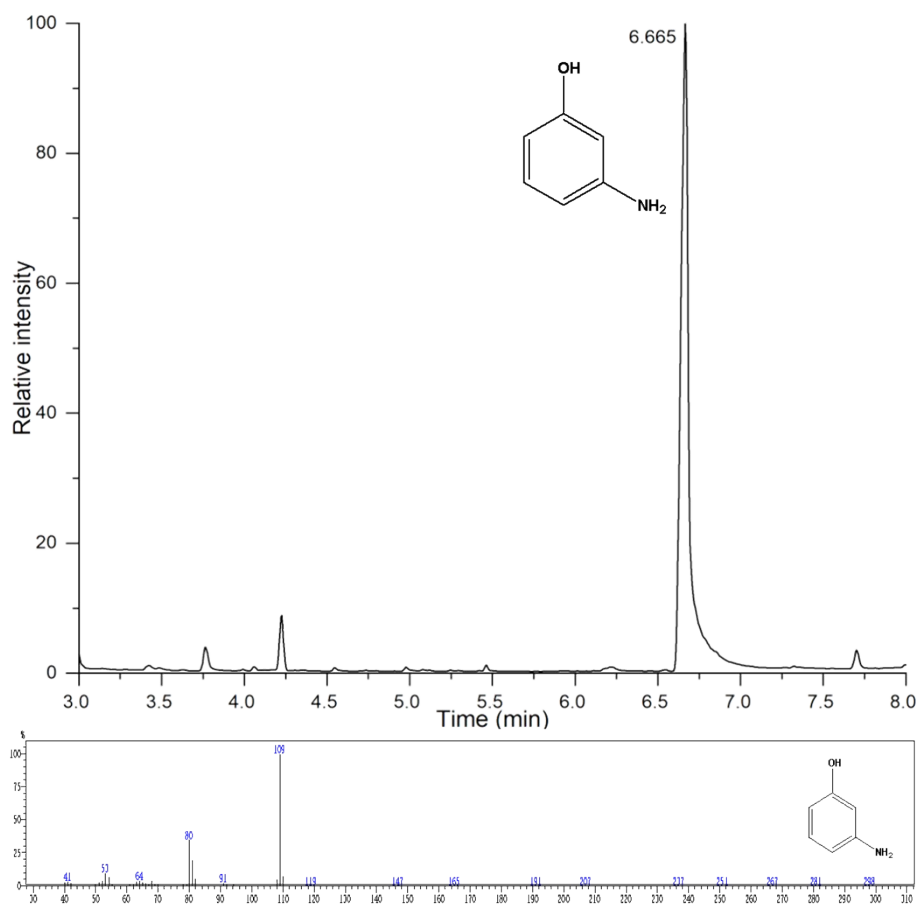

**Fig. S19.** GC-MS data of 3-Nitrophenol reaction results by using  $\text{Cr}_2\text{O}_3/\text{NC}$  as catalysts.

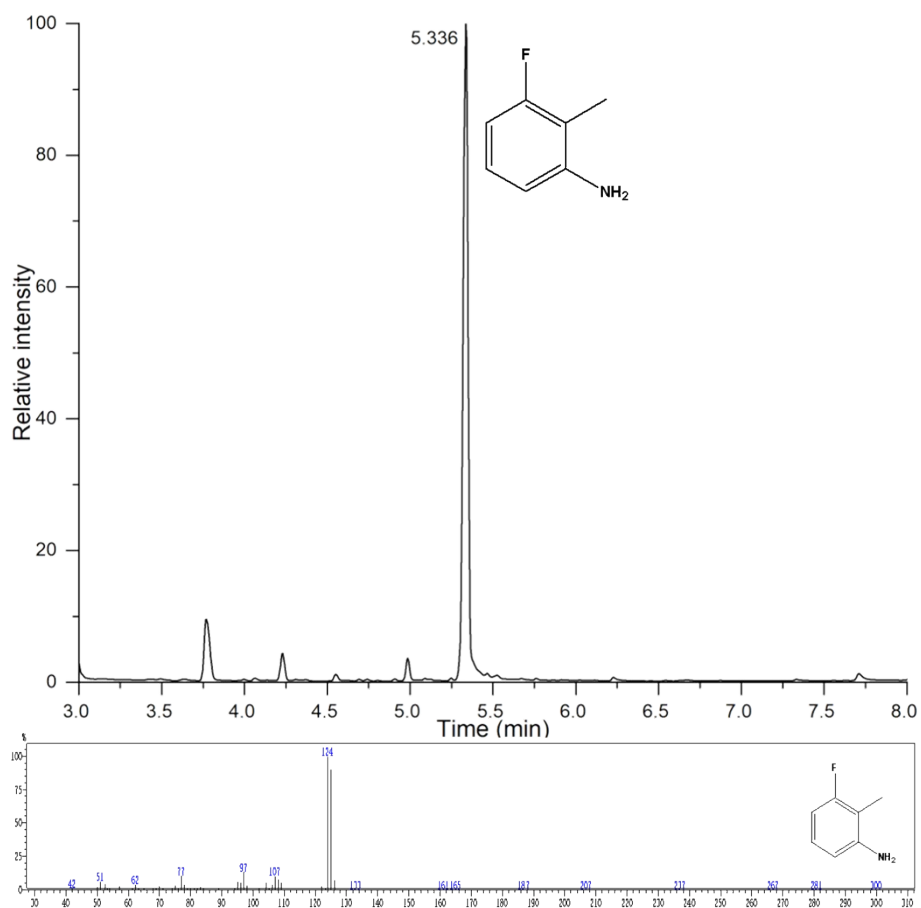

Fig. S20. GC-MS data of 2-Fluoro-6-nitrotoluene reaction results by using Cr<sub>2</sub>O<sub>3</sub>/NC as catalysts.

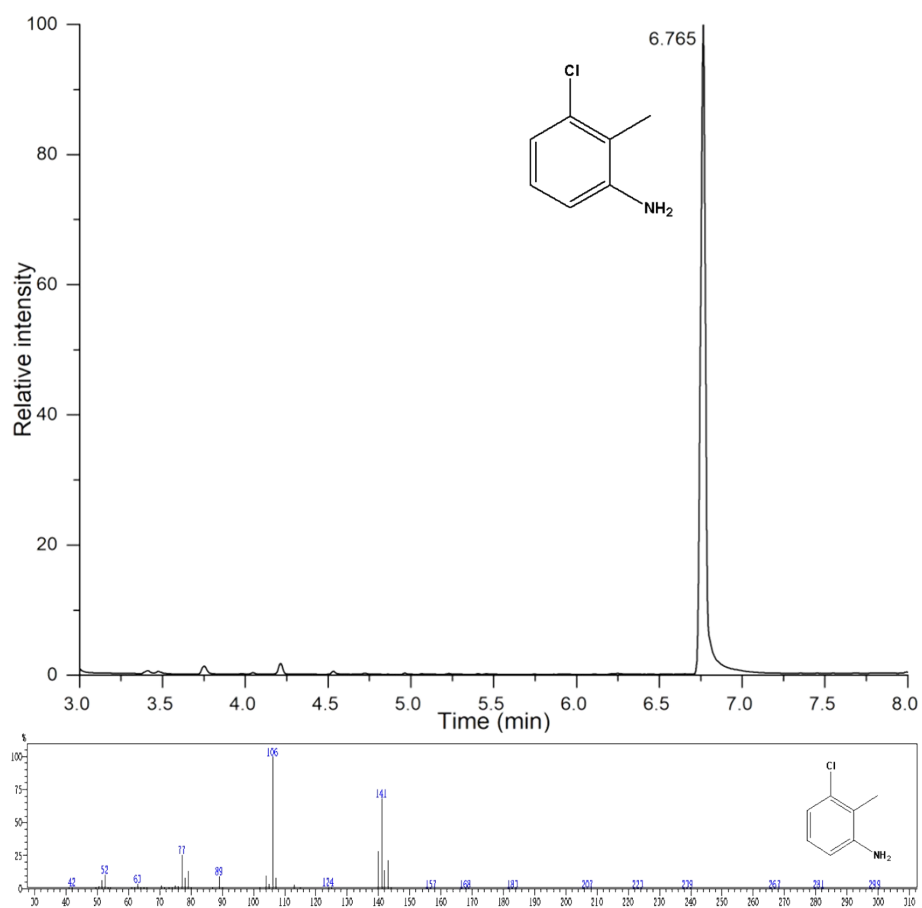

Fig. S21. GC-MS data of 2-Chloro-6-nitrotoluene reaction results by using  $\text{Cr}_2\text{O}_3/\text{NC}$  as catalysts.



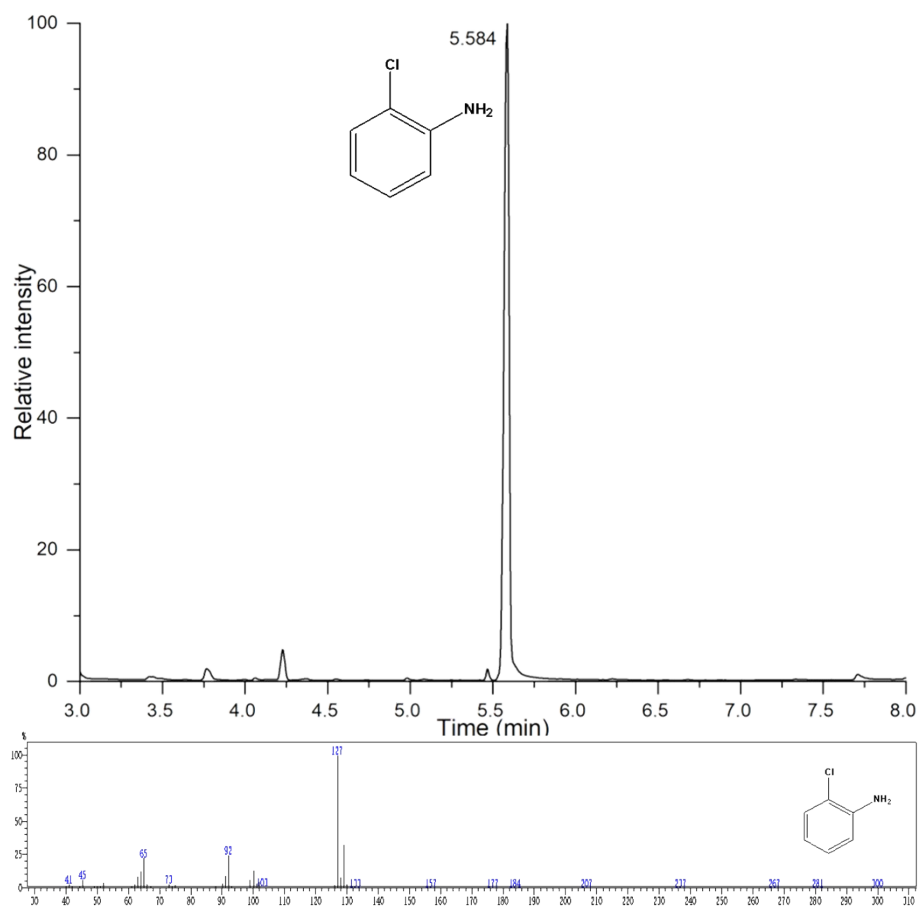

Fig. S22. GC-MS data of 2-Chloronitrobenzene reaction results by using  $\text{Cr}_2\text{O}_3/\text{NC}$  as catalysts.

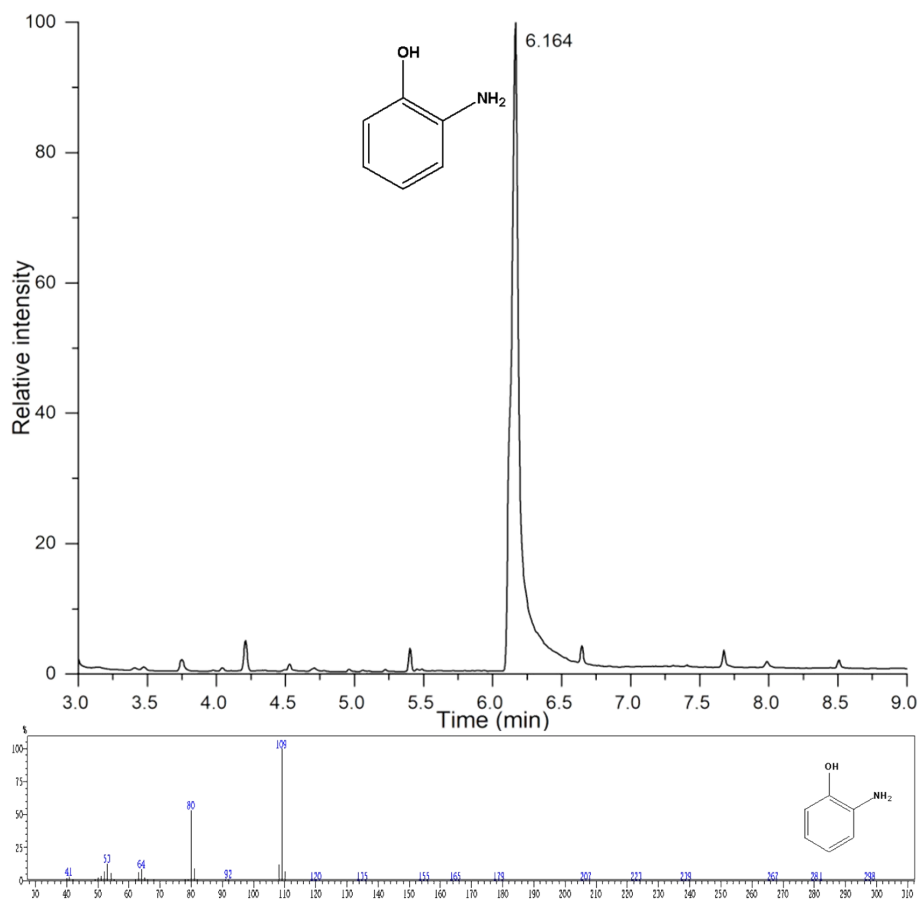

**Fig. S23.** GC-MS data of 2-Nitrophenol reaction results by using  $\text{Cr}_2\text{O}_3/\text{NC}$  as catalysts.

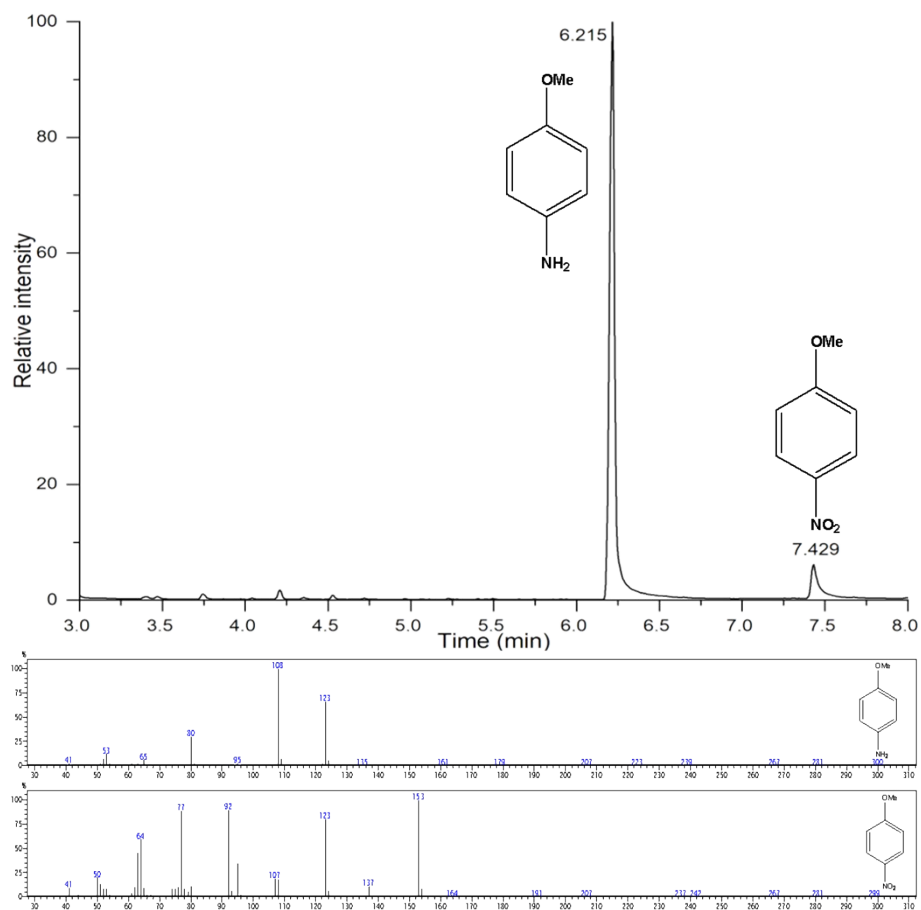

Fig. S24. GC-MS data of 4-Nitroanisole reaction results by using  $\text{Cr}_2\text{O}_3/\text{NC}$  as catalysts.

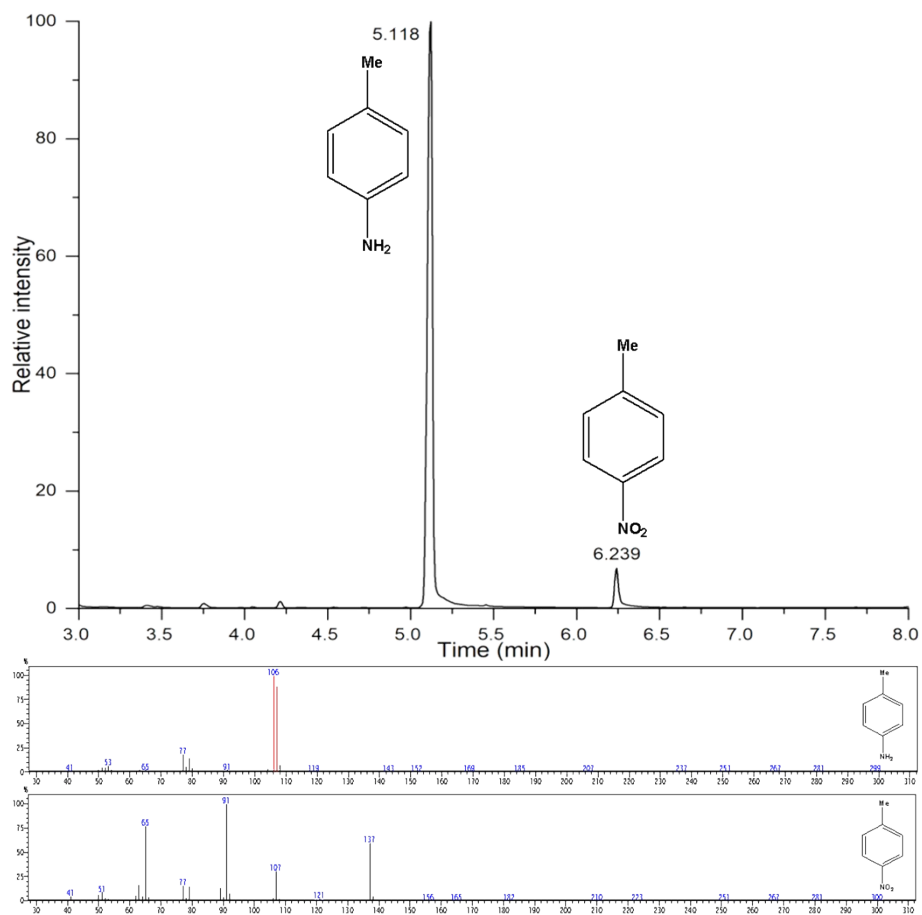

Fig. S25. GC-MS data of 4-Nitrotoluene reaction results by using Cr<sub>2</sub>O<sub>3</sub>/NC as catalysts.

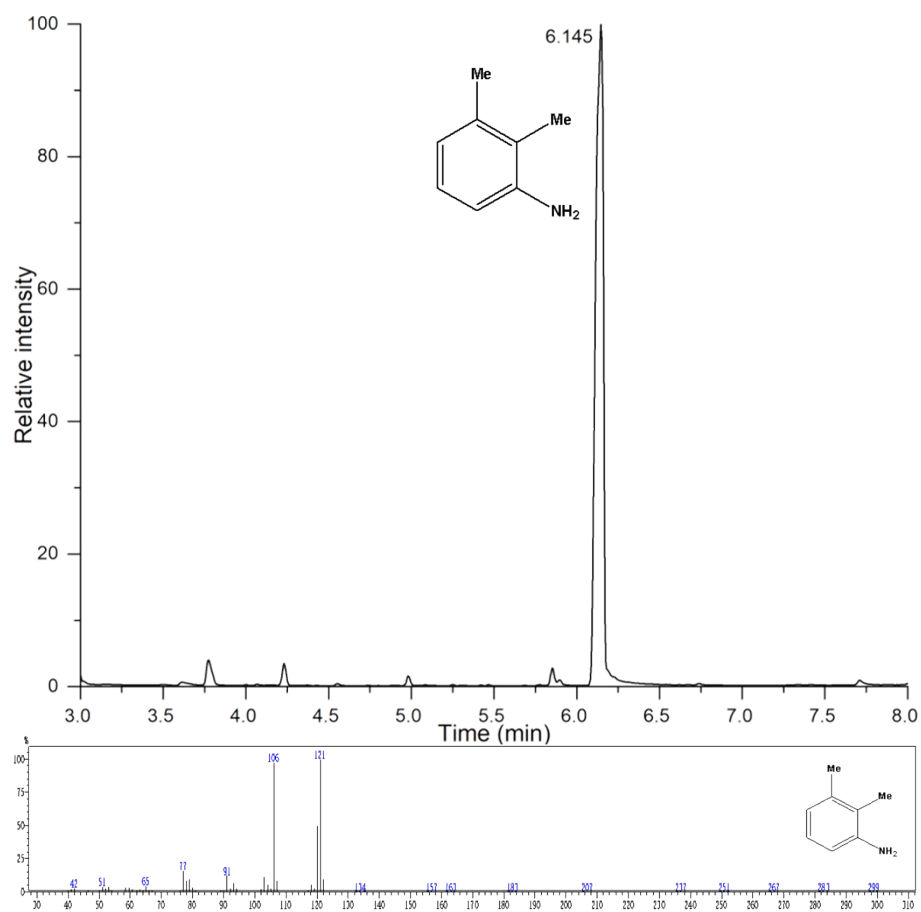

Fig. S26. GC-MS data of 3-Nitro-o-xylene reaction results by using  $\text{Cr}_2\text{O}_3/\text{NC}$  as catalysts.

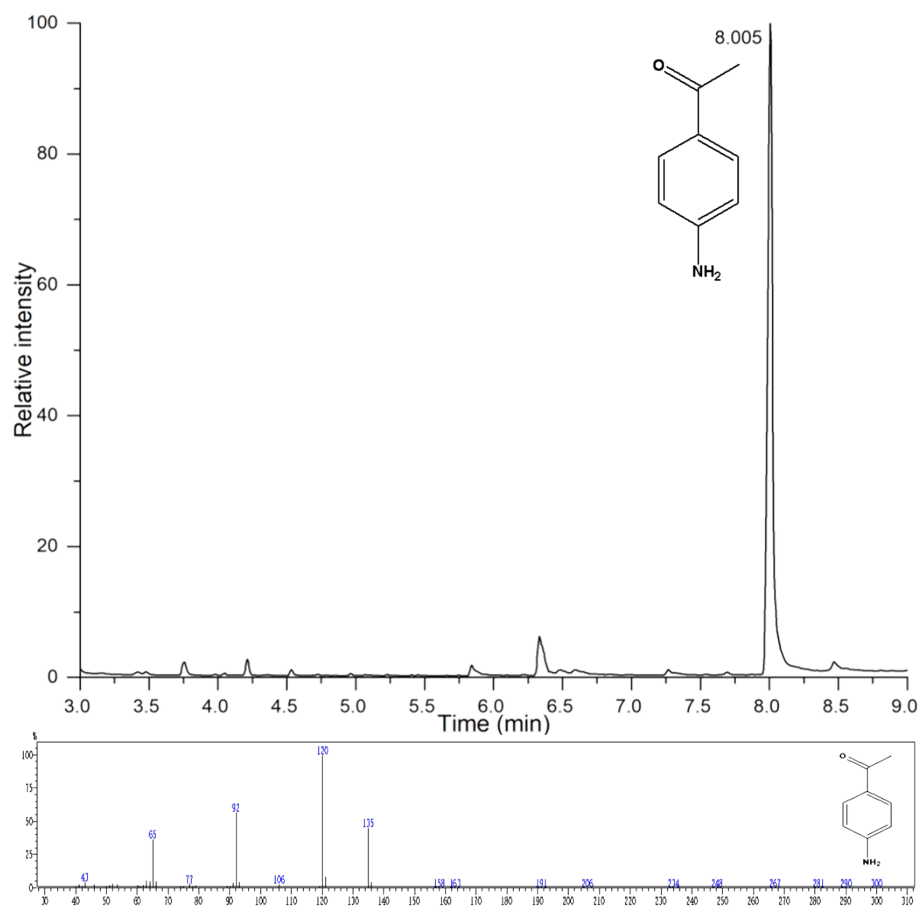

Fig. S27. GC-MS data of p-Nitroacetophenone reaction results by using  $\text{Cr}_2\text{O}_3/\text{NC}$  as catalysts.

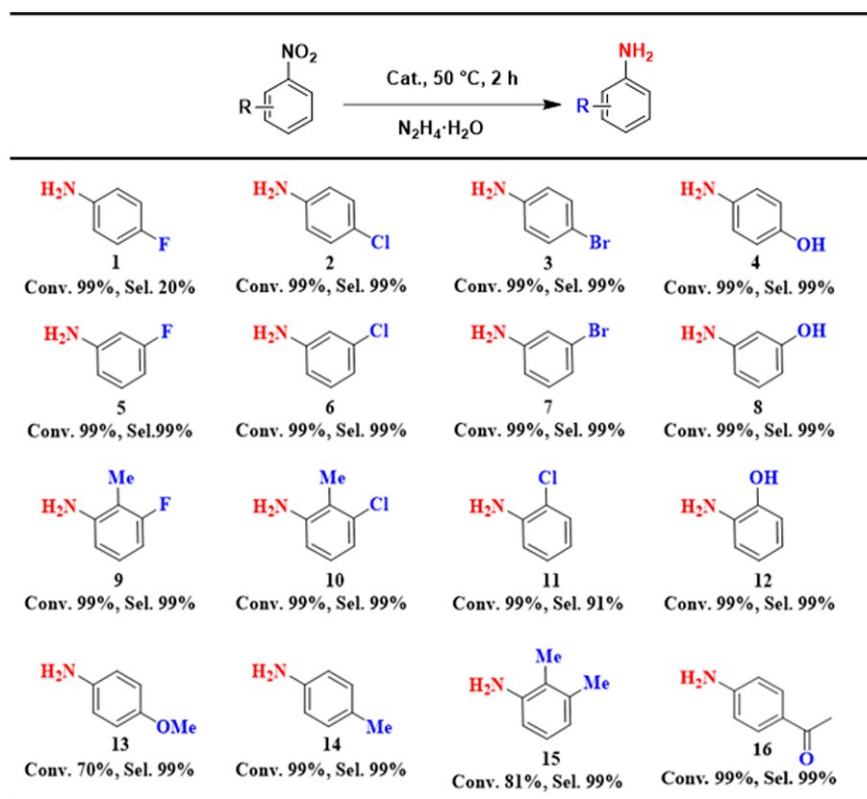

**Fig. S28.** Hydrogenation of various substituted nitrobenzene compounds over the Mo<sub>2</sub>C/NC catalyst. The conversion (conv.) and selectivity (sel.) are evaluated by GC and GC-MS analysis with dodecane as an internal standard).

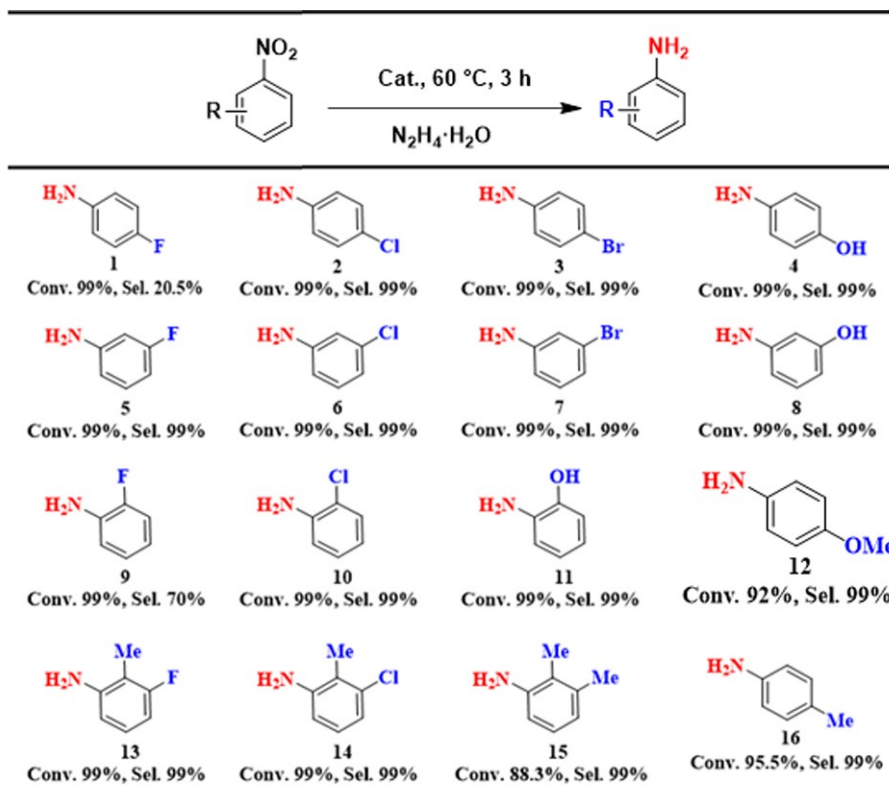

**Fig. S29.** Hydrogenation of various substituted nitrobenzene compounds over  $V_2O_3/NC$  catalyst. The conversion (conv.) and selectivity (sel.) are evaluated by GC and GC-MS analysis with dodecane as an internal standard).



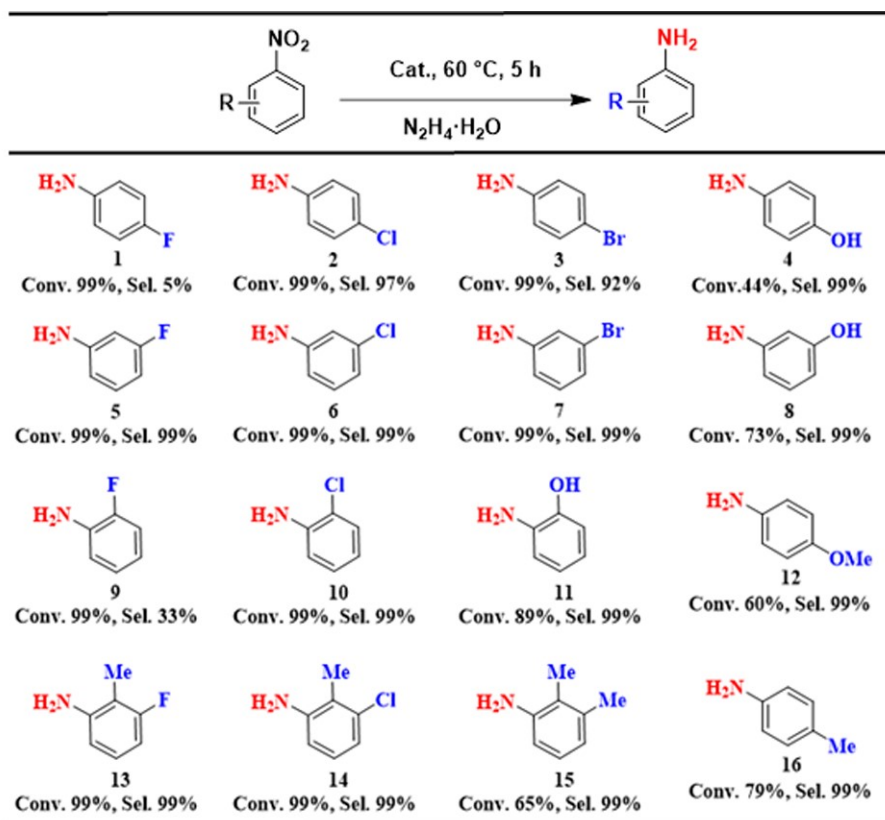

**Fig. S30.** Hydrogenation of various substituted nitrobenzene compounds over the  $WO_x/NC$  catalyst. The conversion (conv.) and selectivity (sel.) are evaluated by GC and GC-MS analysis with dodecane as an internal standard).
